# Supplementary material
Source: Royal Society of Chemistry journal article supplement (doi:10.1039/d5qm00812c)
Supplement: d5qm00812c1.pdf [file d5qm00812c1.pdf]

## Supporting Information

### **Amino Acid-Derived Cu(II)-Coordinated Supramolecular Hydrogel with Tunable Mechanics, Self-Healing, and Underwater Adhesion**

Nishikanta Singh,<sup>[a]</sup> Koushik Mahata,<sup>[b]</sup> Durgesh Kumar Sinha,<sup>[a]</sup> and Sanjib Banerjee\*<sup>[a]</sup>

<sup>a</sup>Department of Chemistry, Indian Institute of Technology Bhilai, Durg 491002, Chhattisgarh, India

<sup>b</sup>Department of Materials Science and Metallurgical Engineering, Indian Institute of Technology Bhilai, Durg 491002, Chhattisgarh, India

\*Corresponding Author

E-mail: [sanjib.banerjee@iitbhilai.ac.in](mailto:sanjib.banerjee@iitbhilai.ac.in)

|                                                                                                                                                              |              |
|--------------------------------------------------------------------------------------------------------------------------------------------------------------|--------------|
| <b>SB. Supporting Tables, Schemes, and Figures</b>                                                                                                           | <b>S3-S9</b> |
| Scheme S1. Synthesis of Cu(LysMAM) <sub>2</sub> crosslinker.                                                                                                 | S3           |
| Scheme S2. Synthesis of poly(Cu(LysMAM) <sub>2-r</sub> -AM) hydrogel.                                                                                        | S3           |
| Scheme S3. Deprotection of poly(Cu(LysMAM) <sub>2-r</sub> -AM) to poly(LysMAM-<br><i>r</i> -AM).                                                             | S3           |
| Figure S1. <sup>1</sup> H NMR spectrum of Cu(LysMAM) <sub>2</sub> crosslinker in D <sub>2</sub> O.                                                           | S4           |
| Figure S2. ATR-IR spectra of (a) L-lysine and Cu(LysMAM) <sub>2</sub> . (b)<br>poly(Cu(LysMAM) <sub>2-r</sub> -AM) hydrogel, Cu(LysMAM) <sub>2</sub> and AM  | S4           |
| Figure S3. EDS mapping of Cu(LysMAM) <sub>2</sub> .                                                                                                          | S5           |
| Figure S4. Reversibility of poly(Cu(LysMAM) <sub>2-r</sub> -AM) hydrogel.                                                                                    | S5           |
| Figure S5. Rheology of the metallo-supramolecular hydrogel<br>poly(Cu(LysMAM) <sub>2-r</sub> -AM).                                                           | S6           |
| Figure S6. Swelling study of the hydrogel in different solvents, i.e. deionized<br>water, DMSO, ethanol, and toluene.                                        | S6           |
| Figure S7. Lap-shear test data of poly(Cu(LysMAM) <sub>2-r</sub> -AM) hydrogel<br>adhesive on glass surfaces before and after swelling in water for<br>24 h. | S7           |
| Table S1. Correlations and participants' information on flat foot detection.                                                                                 | S7           |
| Figure S8. Represents the effect of pressure on the resistance of<br>poly(Cu(LysMAM) <sub>2-r</sub> -AM) hydrogel.                                           | S8           |
| Figure S9. Represents the reversibility of poly(Cu(LysMAM) <sub>2-r</sub> -AM)<br>hydrogel in flat foot setup.                                               | S8           |
| Table S2. Comparison with other reported metal-ion and supramolecular<br>hydrogels.                                                                          | S9           |
| <b>References</b>                                                                                                                                            | <b>S10</b>   |

## B. Supporting Tables, Schemes, and Figures

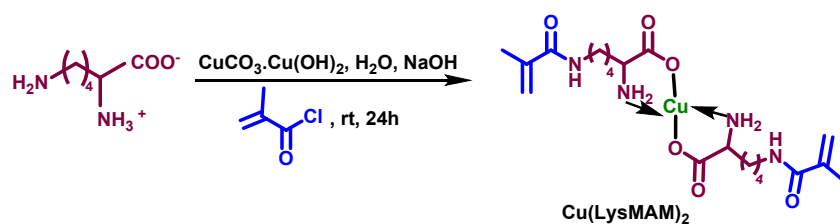

**Scheme S1.** Synthesis of  $\text{Cu(LysMAM)}_2$  crosslinker.

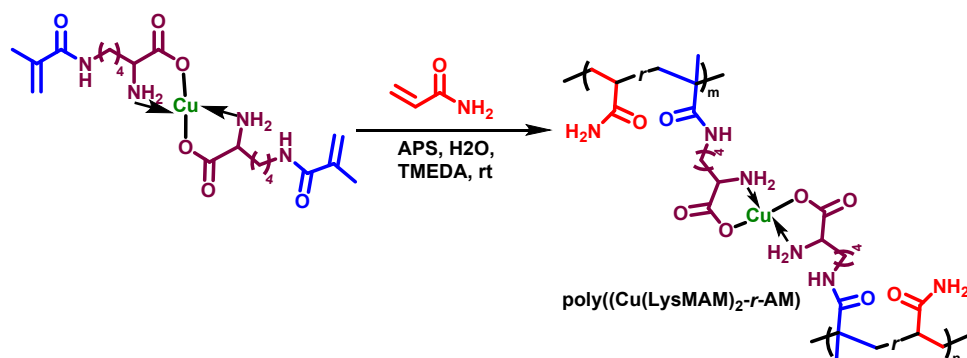

**Scheme S2.** Synthesis of  $\text{poly}(\text{Cu(LysMAM)}_2\text{-}r\text{-AM})$  hydrogel.

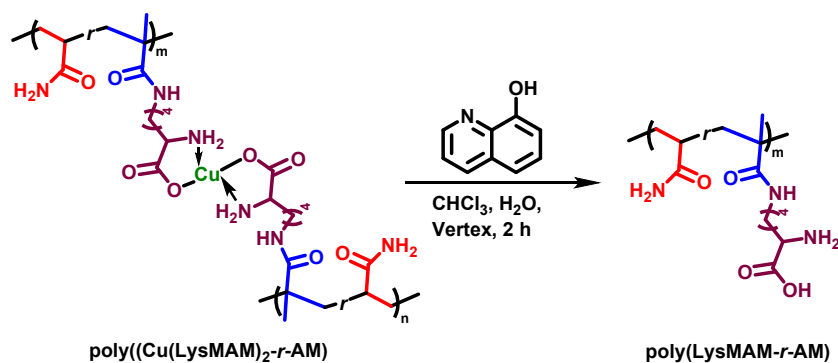

**Scheme S3.** Deprotection of  $\text{poly}(\text{Cu(LysMAM)}_2\text{-}r\text{-AM})$  to  $\text{poly(LysMAM-}r\text{-AM)}$ .

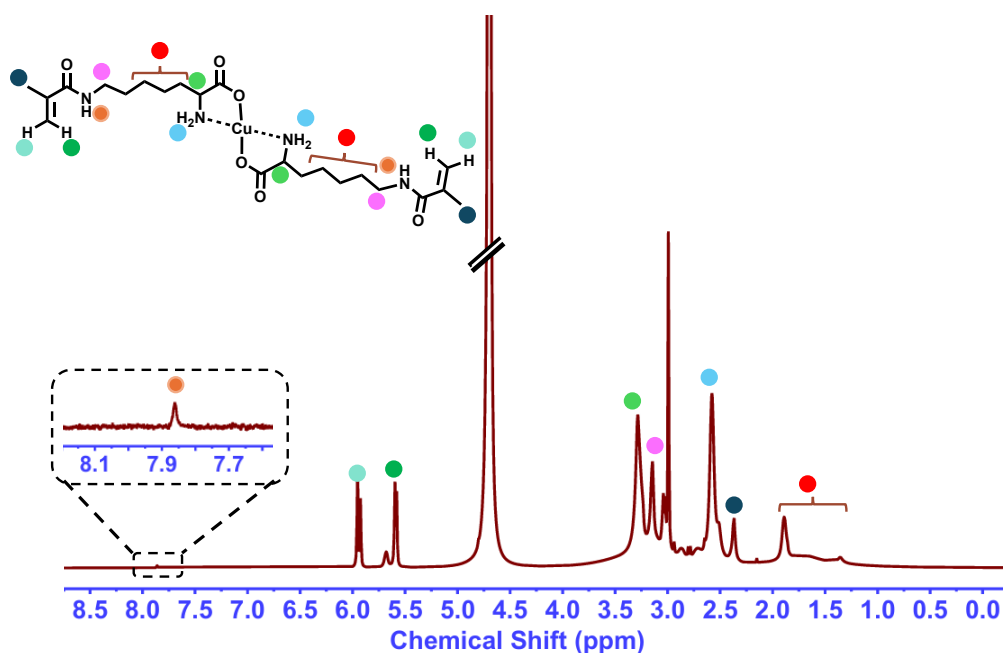

**Figure S1.**  $^1\text{H}$  NMR spectrum of  $\text{Cu}(\text{LysMAM})_2$  crosslinker in  $\text{D}_2\text{O}$ .

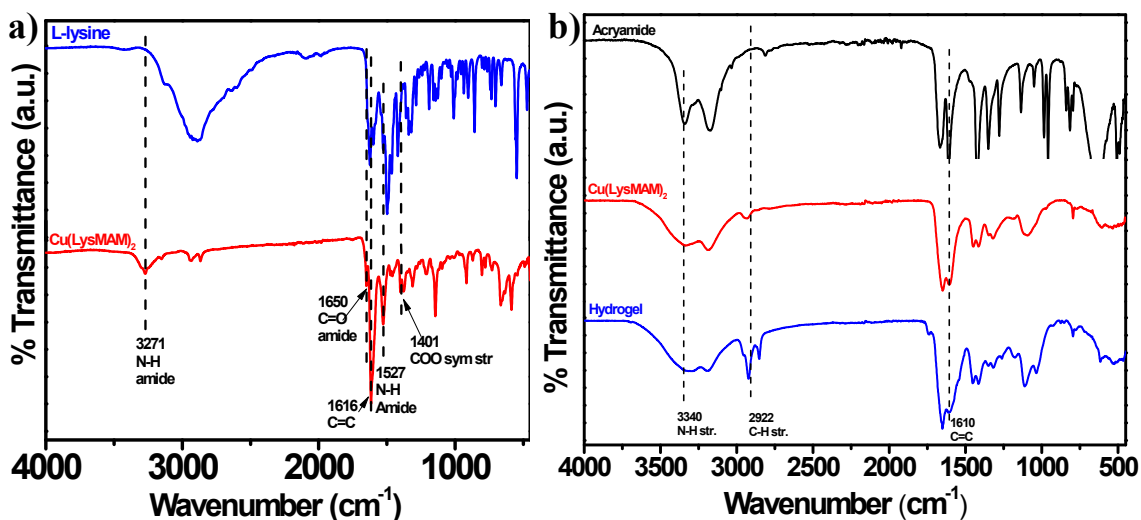

**Figure S2.** ATR-IR spectra of (a) L-lysine and  $\text{Cu}(\text{LysMAM})_2$ . (b) poly( $\text{Cu}(\text{LysMAM})_2$ -*r*-AM) hydrogel,  $\text{Cu}(\text{LysMAM})_2$  and AM.

ATR-IR spectroscopy (Figure S2(a)) shows the characteristic stretching of N-H of amide at  $3271\text{ cm}^{-1}$ , C=O of amide at  $1650\text{ cm}^{-1}$ , N-H sym stretching at  $1527\text{ cm}^{-1}$ ,  $1640\text{ cm}^{-1}$  corresponds to C=C of  $\text{Cu}(\text{LysMAM})_2$ . (Figure S2(b)) shows the ATR-IR spectroscopy of poly( $\text{Cu}(\text{LysMAM})_2$ -*r*-AM) hydrogel at  $3400\text{--}3000\text{ cm}^{-1}$ ,  $\nu\text{N-H}$  (amine, amide);  $2925\text{ cm}^{-1}$ ,  $\nu\text{C-H}$  (vinyl);  $1530\text{ cm}^{-1}$ , absence of  $1610\text{ cm}^{-1}$ ,  $\nu\text{C=C}$ ; confirms the successful polymerization of AM and  $\text{Cu}(\text{LysMAM})_2$ .

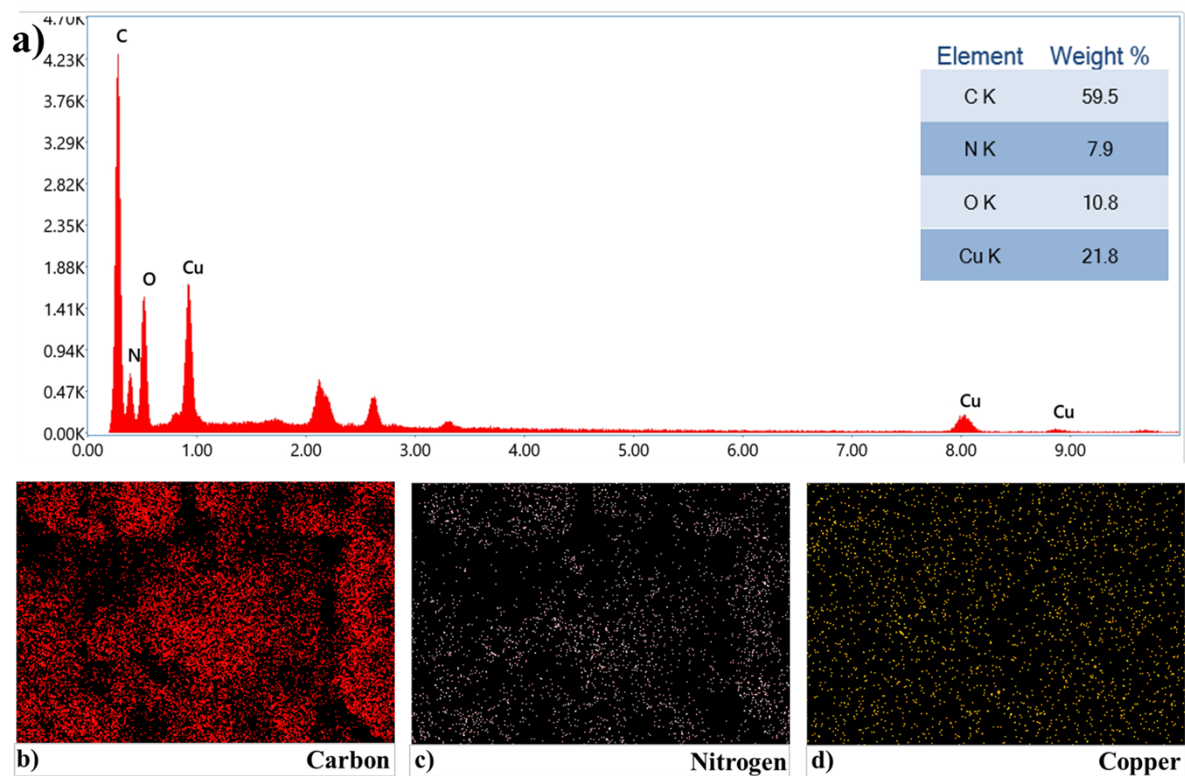

**Figure S3.** EDS mapping of  $\text{Cu}(\text{LysMAM})_2$ .

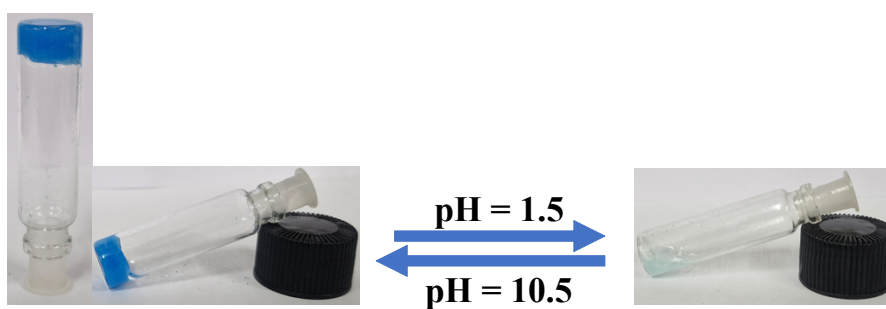

**Figure S4.** Represents the reversibility of  $\text{poly}(\text{Cu}(\text{LysMAM})_2\text{-}r\text{-AM})$  hydrogel. Adding NaOH binds the polymer with metal ions to form a hydrogel material, which can be reversed by adding HCl to the hydrogel.

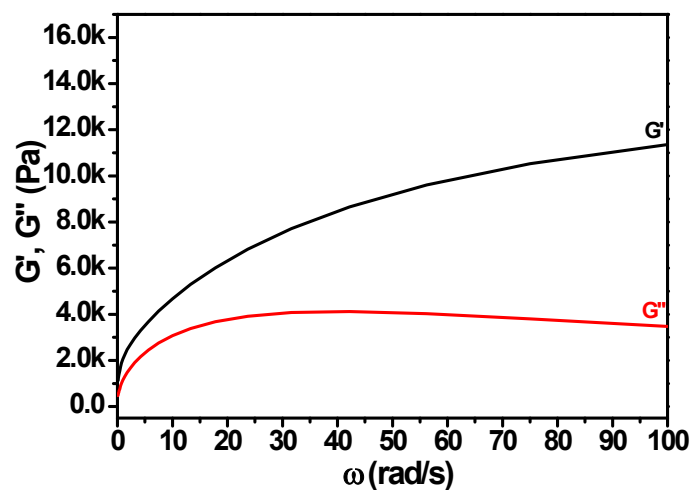

**Figure S5.** Rheology of the metallo-supramolecular hydrogel poly(Cu(LysMAM)<sub>2</sub>-*r*-AM).

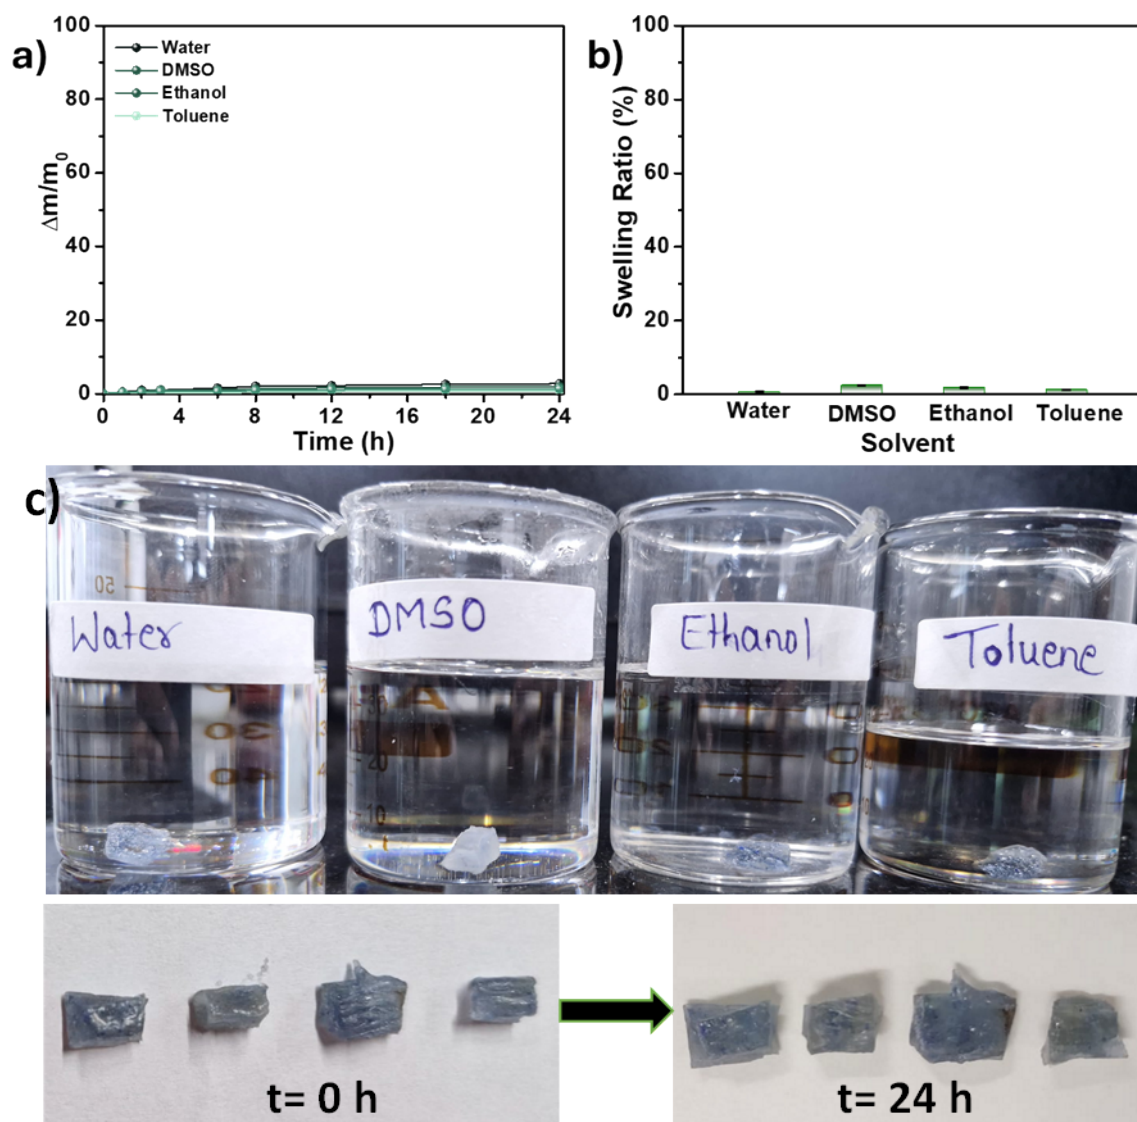

**Figure S6.** Swelling study of the hydrogel in different solvents, i.e. deionized water, DMSO, ethanol, and toluene; (a) time-dependent swelling behavior ( $\Delta m/m_0$ ) of poly(Cu(LysMAM)<sub>2</sub>-*r*-AM) gels, (b) corresponding equilibrium swelling ratios (%), (c) Images of hydrogels illustrating their swelling in various solvents, along with a comparison of their appearance before and after swelling.

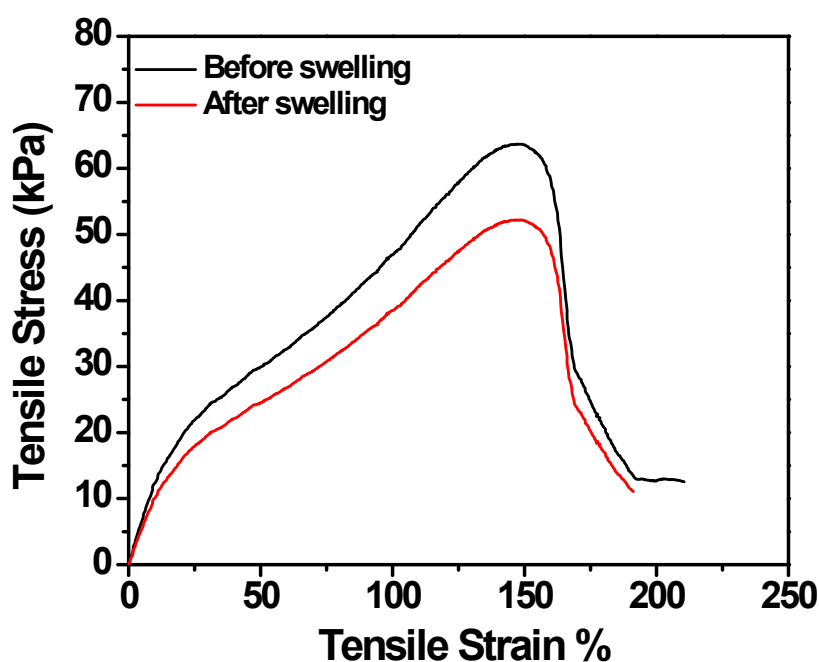

**Figure S7.** Lap-shear test data of poly(Cu(LysMAM)<sub>2</sub>-*r*-AM) hydrogel adhesive on glass surfaces before and after swelling in water for 24 h.

**Table S1.** Correlations and participants' information on flat foot detection

| Gender | No. of participants | Average age | Average Shoe size | Average body weight |
|--------|---------------------|-------------|-------------------|---------------------|
| Female | 22                  | 22-28       | 38                | 48 kg               |
| Male   | 25                  | 22-28       | 42                | 65 kg               |

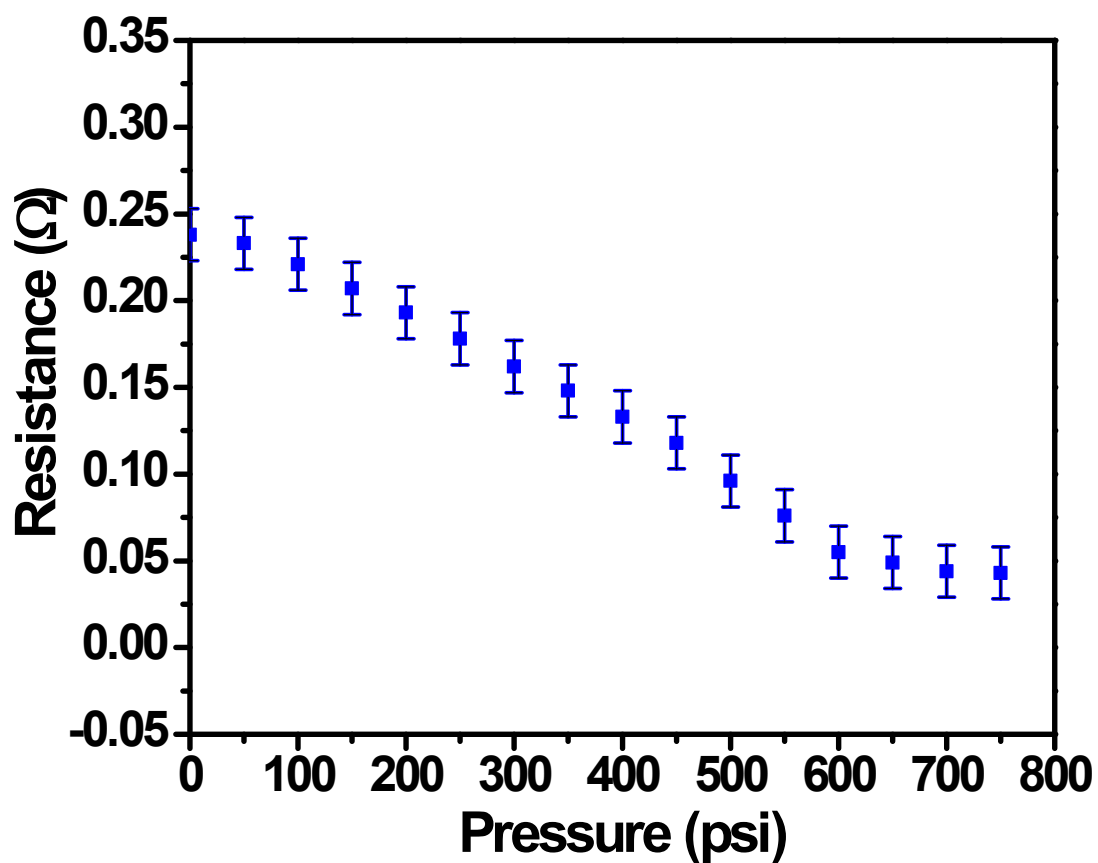

**Figure S8.** Represents the effect of pressure on the resistance of poly(Cu(LysMAM)<sub>2</sub>-*r*-AM) hydrogel.

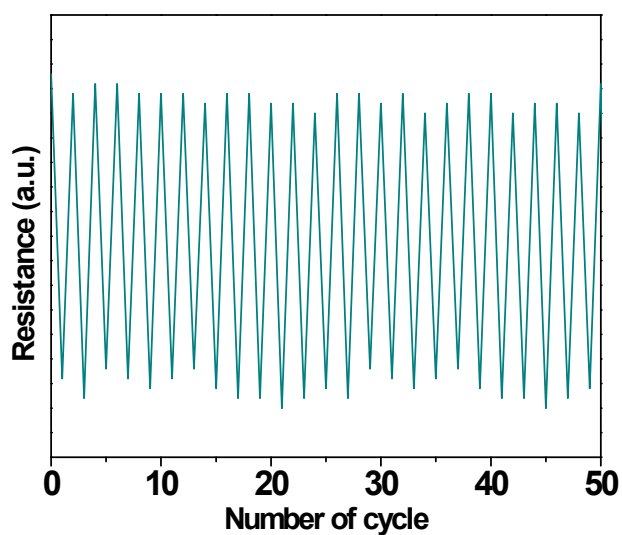

**Figure S9.** Represents the reversibility of poly(Cu(LysMAM)<sub>2</sub>-*r*-AM) hydrogel in flat foot setup.

**Table S2.** Comparison with other reported metal-ion and supramolecular hydrogels.

| Hydrogel System                                             | Tensile Strength | Self-Healing Efficiency | Adhesion                                                               | Reference |
|-------------------------------------------------------------|------------------|-------------------------|------------------------------------------------------------------------|-----------|
| This Work<br>(poly(Cu(LysMAM) <sub>2</sub> - <i>r</i> -AM)) | 140 kPa          | ~92% in 1 h             | Good underwater adhesion                                               | This Work |
| Zn(II) Salphen metallogel complexes                         | ~100 Pa          | No Self-healing         | No adhesion                                                            | 1         |
| peptide/Zn <sup>2+</sup> hydrogel                           | ~80 Pa           | No Self-healing         | No adhesion                                                            | 2         |
| TA@CNC/PVA/gel hydrogels                                    | 25.54 kPa        | 93 % in 1 h             | The strong adhesion to wood, paper, copper sheets, glass, and surface. | 3         |
| Cu(II)–Inosine Supramolecular Gel                           | 10 kPa           | 3 h                     | No adhesion                                                            | 4         |
| DCMC/CS/PAA Polysaccharide-Composite Hydrogel               | 90 kPa           | 93% in 24 h             | Self-adhesion                                                          | 5         |
| CNF–Al <sup>3+</sup> –Xylan Nanocomposite                   | 31.1 kPa         | 95% in 2 h              | Yes                                                                    | 6         |
| Chitosan–HA–Al <sup>3+</sup> Hydrogel                       | 379.5 kPa        | ~87%                    | Not specified                                                          | 7         |
| P(AM-HisMA)-Fe <sup>3+</sup> –Hydrogel                      | 89 kPa           | >84% in 5 min           | Porcine skin                                                           | 8         |
| 3D-printed PVC/DBA Hydrogel                                 | 26.4 kPa         | Not reported            | Not reported                                                           | 9         |

|                                                   |         |                 |              |    |
|---------------------------------------------------|---------|-----------------|--------------|----|
| Ru(II)-metallogel                                 | 1.4 kPa | No Self-healing | No adhesion  | 10 |
| Ag <sup>+</sup> and Fe <sup>3+</sup> -metallogels | 10 kPa  | No Self-healing | No adhesion  | 11 |
| Fe <sup>3+</sup> -P(AAm-co-AAc) Hydrogel          | 7 kPa   | Yes             | Not reported | 12 |

## Reference

1. Stühler, M. R.; Makki, H.; Silbernagl, D.; Dimde, M.; Ludwig, K.; Tegner, B. E.; Greve, C.; Rausch, K.; Herzig, E. M.; Köhler, A., Flexibility and Dynamicity Enhances and Controls Supramolecular Self-Assembly of Zinc (II) Metallogels. *Adv. Funct. Mater.* **2025**, 2507793.
2. Adole, V. V.; Wang, Z.; Tang, Y.; Mishra, G.; Sahu, I.; Wei, G.; Chakraborty, P., Histidine Containing Minimalistic-Peptide-Based Nanostructured Hydrogel for Multiple Enzyme-Mimicking Catalytic Activities. *Small* **2025**, 21 (51), e11661.
3. Gu, R.; Chen, W.; Zou, Y.; Yang, T.; Liu, Z.; Yu, N.; Huang, J.; Gan, L., Cellulose nanocrystal-modified hydrogel wearable sensor with self-healing function from dynamic bond and controllable dual hydrogen-bond crosslinking. *Carbohydr. Polym.* **2025**, 363, 123760.
4. Singh, S.; Rohilla, K.; Verma, N.; Sharma, B., Cu(II)-Inosine Supramolecular Gel with Nanofibrous Morphology as Laccase and Peroxidase Mimic for Optical Sensing Applications. *ACS Appl. Nano Mater.* **2025**, 8 (32), 15953-15965.
5. Ling, Q.; Liu, W.; Liu, J.; Zhao, L.; Ren, Z.; Gu, H., Highly Sensitive and Robust Polysaccharide-Based Composite Hydrogel Sensor Integrated with Underwater Repeatable Self-Adhesion and Rapid Self-Healing for Human Motion Detection. *ACS Appl. Mater. Interfaces* **2022**, 14 (21), 24741-24754.
6. Liu, X.; Chang, M.; Zhang, H.; Ren, J., Rapid self-healing and adhesion nanocomposite physical hydrogels based on dynamic coordination bond. *Polym Adv Technol.* **2022**, 33 (12), 4174-4185.

7. Zhang, Q.; Li, C.; Du, X.; Zhong, H.; He, Z.; Hong, P.; Li, Y.; Jing, Z., High strength, tough and self-healing chitosan-based nanocomposite hydrogels based on the synergistic effects of hydrogen bond and coordination bond. *J. Polym. Res.* **2022**, *29* (8), 335.
8. Zhang, H.; He, J.; Qu, J., Metal-coordinated amino acid hydrogels with ultra-stretchability, adhesion, and self-healing properties for wound healing. *Eur. Polym. J.* **2022**, *179*, 111548.
9. Wang, Z.; Wang, Y.; Wang, Z.; He, Q.; Li, C.; Cai, S., 3D Printing of Electrically Responsive PVC Gel Actuators. *ACS Appl. Mater. Interfaces* **2021**, *13* (20), 24164-24172.
10. Malviya, N.; Sonkar, C.; Ganguly, R.; Bhattacharjee, D.; Bhabak, K. P.; Mukhopadhyay, S., Novel Approach to Generate a Self-Deliverable Ru(II)-Based Anticancer Agent in the Self-Reacting Confined Gel Space. *ACS Appl. Mater. Interfaces* **2019**, *11* (50), 47606-47618.
11. Panja, A.; Ghosh, K., Cholesterol-based diazine derivative: selective sensing of Ag<sup>+</sup> and Fe<sup>3+</sup> ions through gelation and the performance of metallo gels in dye and picric acid adsorption from water. *Mater. Chem. Front.* **2018**, *2* (12), 2286-2296.
12. Zheng, S. Y.; Ding, H.; Qian, J.; Yin, J.; Wu, Z. L.; Song, Y.; Zheng, Q., Metal-Coordination Complexes Mediated Physical Hydrogels with High Toughness, Stick-Slip Tearing Behavior, and Good Processability. *Macromolecules* **2016**, *49* (24), 9637-9646.
